# Supplementary material for: Men and women differ in their perception of gender bias in research institutions
Source: PubMed Central journal article supplement (PMC6894819; doi:10.1371/journal.pone.0225763), 2019-12-05

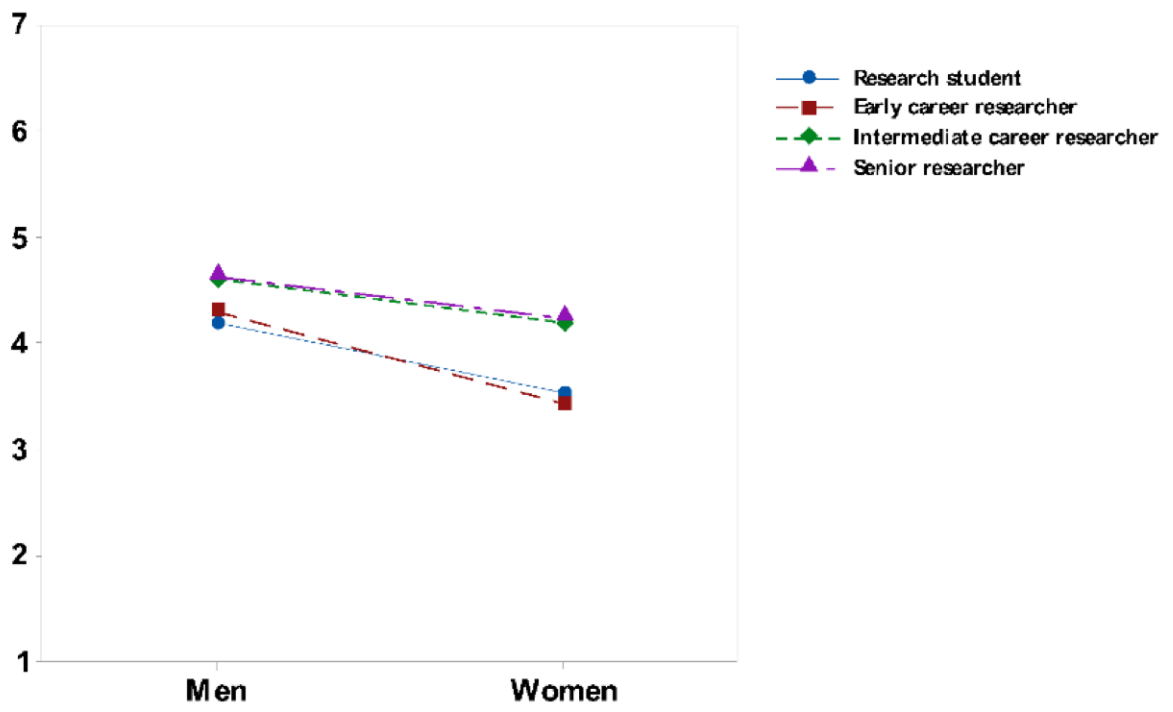

Supplement: pone.0225763.s006.pdf [file pone.0225763.s006.pdf]
