# Supplementary material for: Men and women differ in their perception of gender bias in research institutions
Source: PubMed Central journal article supplement (PMC6894819; doi:10.1371/journal.pone.0225763), 2019-12-05
Supplement: pone.0225763.s008.pdf [file pone.0225763.s008.pdf]

**Table S1.** Description of the questions in the survey and variable names.

| variable_name                                                                         | Question                                                                               | Values                                                  |
|---------------------------------------------------------------------------------------|----------------------------------------------------------------------------------------|---------------------------------------------------------|
| <b><i>Perceptions of gender equality in departments</i></b>                           |                                                                                        |                                                         |
| gender_eq_1                                                                           | In general, men and women are treated equally in my department                         | 1=strongly disagree to<br>7=strongly agree              |
| gender_eq_2                                                                           | My department is committed to promoting gender equality                                |                                                         |
| gender_eq_3                                                                           | If I had concerns about gender equality in my department, I would know who to approach |                                                         |
| gender_eq_4                                                                           | My department is (or would be) responsive to concerns about gender equality            |                                                         |
| gender_eq_5                                                                           | Women are perceived as good leaders in research by other women                         |                                                         |
| gender_eq_6                                                                           | Women are perceived as good leaders in research by men                                 |                                                         |
| <b><i>Perceptions of gender equality in the allocation of tasks and resources</i></b> |                                                                                        |                                                         |
| gender_alloc_1                                                                        | Allocation of desirable and demanded tasks/roles                                       | 1=Much easier for a woman to<br>7 Much easier for a man |
| gender_alloc_2                                                                        | Receipt of mentoring                                                                   |                                                         |
| gender_alloc_3                                                                        | Attention from senior management                                                       |                                                         |
| gender_alloc_4                                                                        | Access to informal circles of influence                                                |                                                         |
| gender_alloc_5                                                                        | Receiving positive feedback from management                                            |                                                         |
| gender_alloc_6                                                                        | Being recruited and selected for academic posts                                        |                                                         |
| gender_alloc_7                                                                        | Promotion to senior posts                                                              |                                                         |
| gender_alloc_8                                                                        | Allocation of career development opportunities                                         |                                                         |
| gender_alloc_9                                                                        | Distribution of office/laboratory space or equipment                                   |                                                         |
| gender_alloc_10                                                                       | Invitations to conferences                                                             |                                                         |
| gender_alloc_11                                                                       | Appointments to editorships                                                            |                                                         |
| gender_alloc_12                                                                       | Recognition of intellectual contributions                                              |                                                         |
| gender_alloc_13                                                                       | Allocation of administrative tasks                                                     |                                                         |
| gender_alloc_14                                                                       | Allocation of pastoral care roles                                                      |                                                         |
| gender_alloc_15                                                                       | Allocation of teaching                                                                 |                                                         |
