# Supplementary material for: Men and women differ in their perception of gender bias in research institutions
Source: PubMed Central journal article supplement (PMC6894819; doi:10.1371/journal.pone.0225763), 2019-12-05
Supplement: pone.0225763.s009.pdf [file pone.0225763.s009.pdf]

**Table S2.** Comparison between responses from female participants that did not complete the survey (excluded respondents) and participants included in the analysis (respondents that completed the survey).

| Women           | Respondents that completed the survey |      |     | Excluded respondents |      |     | Excluded respondents vs completed survey respondents |                  |         |      |         |
|-----------------|---------------------------------------|------|-----|----------------------|------|-----|------------------------------------------------------|------------------|---------|------|---------|
|                 | Mean                                  | SD   | N   | Mean                 | SD   | N   | Difference in Means                                  | SE of difference | t ratio | df   | p value |
| gender eq 1     | 5.06                                  | 1.79 | 831 | 4.84                 | 1.89 | 453 | -0.22                                                | 0.11             | 2.08    | 1282 | 0.04    |
| gender eq 2     | 4.32                                  | 1.93 | 832 | 4.42                 | 2.02 | 451 | 0.10                                                 | 0.11             | 0.88    | 1281 | 0.38    |
| gender eq 3     | 3.90                                  | 2.14 | 829 | 3.83                 | 2.15 | 446 | -0.07                                                | 0.13             | 0.52    | 1273 | 0.60    |
| gender eq 4     | 4.33                                  | 2.04 | 829 | 4.46                 | 2.08 | 448 | 0.13                                                 | 0.12             | 1.05    | 1275 | 0.30    |
| gender eq 5     | 5.00                                  | 1.81 | 829 | 5.10                 | 1.77 | 448 | 0.10                                                 | 0.11             | 0.93    | 1275 | 0.35    |
| gender eq 6     | 4.01                                  | 1.89 | 827 | 3.96                 | 1.88 | 451 | -0.05                                                | 0.11             | 0.46    | 1276 | 0.65    |
| gender alloc 1  | 4.67                                  | 1.49 | 826 | 4.59                 | 1.53 | 437 | -0.08                                                | 0.09             | 0.87    | 1261 | 0.38    |
| gender alloc 2  | 4.21                                  | 1.55 | 824 | 4.33                 | 1.48 | 440 | 0.12                                                 | 0.09             | 1.35    | 1262 | 0.18    |
| gender alloc 3  | 4.65                                  | 1.55 | 820 | 4.78                 | 1.42 | 441 | 0.13                                                 | 0.09             | 1.49    | 1259 | 0.14    |
| gender alloc 4  | 5.14                                  | 1.54 | 826 | 5.05                 | 1.68 | 442 | -0.09                                                | 0.09             | 0.97    | 1266 | 0.33    |
| gender alloc 5  | 4.51                                  | 1.58 | 826 | 4.64                 | 1.54 | 439 | 0.13                                                 | 0.09             | 1.38    | 1263 | 0.17    |
| gender alloc 6  | 4.95                                  | 1.34 | 827 | 4.81                 | 1.57 | 442 | -0.14                                                | 0.08             | 1.65    | 1267 | 0.10    |
| gender alloc 7  | 5.28                                  | 1.59 | 824 | 5.27                 | 1.57 | 441 | -0.01                                                | 0.09             | 0.10    | 1263 | 0.92    |
| gender alloc 8  | 4.96                                  | 1.48 | 827 | 4.93                 | 1.57 | 440 | -0.03                                                | 0.09             | 0.37    | 1265 | 0.71    |
| gender alloc 9  | 4.27                                  | 1.18 | 825 | 4.21                 | 1.32 | 441 | -0.06                                                | 0.07             | 0.83    | 1264 | 0.41    |
| gender alloc 10 | 4.60                                  | 1.58 | 825 | 4.58                 | 1.54 | 440 | -0.02                                                | 0.09             | 0.21    | 1263 | 0.83    |
| gender alloc 11 | 4.00                                  | 2.08 | 819 | 4.00                 | 2.08 | 432 | 0.00                                                 | 0.12             | 0.01    | 1249 | 0.99    |
| gender alloc 12 | 4.88                                  | 1.43 | 826 | 4.91                 | 1.54 | 440 | 0.03                                                 | 0.09             | 0.37    | 1264 | 0.71    |
| gender alloc 13 | 3.25                                  | 1.43 | 822 | 3.30                 | 1.53 | 432 | 0.06                                                 | 0.09             | 0.65    | 1252 | 0.52    |
| gender alloc 14 | 2.28                                  | 2.05 | 810 | 2.52                 | 2.00 | 425 | 0.24                                                 | 0.12             | 1.99    | 1233 | 0.05    |
| gender alloc 15 | 3.71                                  | 1.31 | 826 | 3.67                 | 1.50 | 437 | -0.04                                                | 0.08             | 0.43    | 1261 | 0.67    |
