# Supplementary material for: Men and women differ in their perception of gender bias in research institutions
Source: PubMed Central journal article supplement (PMC6894819; doi:10.1371/journal.pone.0225763), 2019-12-05
Supplement: pone.0225763.s010.pdf [file pone.0225763.s010.pdf]

**Table S3.** Comparison between responses from male participants that did not complete the survey (excluded respondents) and participants included in the analysis (respondents that completed the survey).

| Men                    | Respondents that completed the survey |             |            | Excluded respondents |             |            | Excluded respondents vs completed survey respondents |                  |             |            |             |
|------------------------|---------------------------------------|-------------|------------|----------------------|-------------|------------|------------------------------------------------------|------------------|-------------|------------|-------------|
|                        | Mean                                  | Sd          | N          | Mean                 | Sd          | N          | Difference in Means                                  | SE of difference | t ratio     | df         | p value     |
| <u>gender eq 1</u>     | <u>6.04</u>                           | <u>1.43</u> | <u>472</u> | <u>6.10</u>          | <u>1.29</u> | <u>229</u> | <u>0.06</u>                                          | <u>0.11</u>      | <u>0.54</u> | <u>699</u> | <u>0.59</u> |
| <u>gender eq 2</u>     | <u>4.97</u>                           | <u>1.93</u> | <u>471</u> | <u>5.14</u>          | <u>2.04</u> | <u>229</u> | <u>0.17</u>                                          | <u>0.16</u>      | <u>1.07</u> | <u>698</u> | <u>0.28</u> |
| <u>gender eq 3</u>     | <u>4.51</u>                           | <u>2.18</u> | <u>472</u> | <u>4.34</u>          | <u>2.29</u> | <u>228</u> | <u>-0.18</u>                                         | <u>0.18</u>      | <u>0.99</u> | <u>698</u> | <u>0.32</u> |
| <u>gender eq 4</u>     | <u>5.07</u>                           | <u>1.91</u> | <u>471</u> | <u>4.86</u>          | <u>2.18</u> | <u>227</u> | <u>-0.21</u>                                         | <u>0.16</u>      | <u>1.28</u> | <u>696</u> | <u>0.20</u> |
| <u>gender eq 5</u>     | <u>5.06</u>                           | <u>2.26</u> | <u>468</u> | <u>5.01</u>          | <u>2.21</u> | <u>224</u> | <u>-0.05</u>                                         | <u>0.18</u>      | <u>0.27</u> | <u>690</u> | <u>0.79</u> |
| <u>gender eq 6</u>     | <u>5.39</u>                           | <u>1.77</u> | <u>470</u> | <u>5.29</u>          | <u>1.82</u> | <u>225</u> | <u>-0.10</u>                                         | <u>0.14</u>      | <u>0.68</u> | <u>693</u> | <u>0.50</u> |
| <u>gender alloc 1</u>  | <u>4.05</u>                           | <u>1.17</u> | <u>470</u> | <u>3.92</u>          | <u>1.32</u> | <u>218</u> | <u>-0.13</u>                                         | <u>0.10</u>      | <u>1.30</u> | <u>686</u> | <u>0.20</u> |
| <u>gender alloc 2</u>  | <u>3.85</u>                           | <u>1.05</u> | <u>468</u> | <u>3.73</u>          | <u>1.34</u> | <u>217</u> | <u>-0.13</u>                                         | <u>0.09</u>      | <u>1.34</u> | <u>683</u> | <u>0.18</u> |
| <u>gender alloc 3</u>  | <u>3.88</u>                           | <u>1.17</u> | <u>465</u> | <u>3.85</u>          | <u>1.28</u> | <u>216</u> | <u>-0.03</u>                                         | <u>0.10</u>      | <u>0.35</u> | <u>679</u> | <u>0.73</u> |
| <u>gender alloc 4</u>  | <u>4.13</u>                           | <u>1.51</u> | <u>467</u> | <u>4.08</u>          | <u>1.70</u> | <u>219</u> | <u>-0.06</u>                                         | <u>0.13</u>      | <u>0.43</u> | <u>684</u> | <u>0.67</u> |
| <u>gender alloc 5</u>  | <u>3.78</u>                           | <u>1.30</u> | <u>466</u> | <u>3.70</u>          | <u>1.44</u> | <u>219</u> | <u>-0.08</u>                                         | <u>0.11</u>      | <u>0.71</u> | <u>683</u> | <u>0.48</u> |
| <u>gender alloc 6</u>  | <u>4.03</u>                           | <u>1.29</u> | <u>469</u> | <u>4.00</u>          | <u>1.27</u> | <u>219</u> | <u>-0.03</u>                                         | <u>0.10</u>      | <u>0.28</u> | <u>686</u> | <u>0.78</u> |
| <u>gender alloc 7</u>  | <u>4.25</u>                           | <u>1.43</u> | <u>469</u> | <u>4.24</u>          | <u>1.59</u> | <u>218</u> | <u>-0.01</u>                                         | <u>0.12</u>      | <u>0.11</u> | <u>685</u> | <u>0.91</u> |
| <u>gender alloc 8</u>  | <u>4.06</u>                           | <u>1.34</u> | <u>467</u> | <u>4.00</u>          | <u>1.40</u> | <u>216</u> | <u>-0.05</u>                                         | <u>0.11</u>      | <u>0.46</u> | <u>681</u> | <u>0.65</u> |
| <u>gender alloc 9</u>  | <u>3.81</u>                           | <u>1.03</u> | <u>469</u> | <u>3.87</u>          | <u>1.06</u> | <u>219</u> | <u>0.06</u>                                          | <u>0.09</u>      | <u>0.75</u> | <u>686</u> | <u>0.45</u> |
| <u>gender alloc 10</u> | <u>3.91</u>                           | <u>1.17</u> | <u>467</u> | <u>3.62</u>          | <u>1.55</u> | <u>219</u> | <u>-0.29</u>                                         | <u>0.11</u>      | <u>2.72</u> | <u>684</u> | <u>0.01</u> |
| <u>gender alloc 11</u> | <u>3.42</u>                           | <u>1.72</u> | <u>465</u> | <u>3.18</u>          | <u>1.99</u> | <u>217</u> | <u>-0.23</u>                                         | <u>0.15</u>      | <u>1.55</u> | <u>680</u> | <u>0.12</u> |
| <u>gender alloc 12</u> | <u>4.06</u>                           | <u>1.14</u> | <u>467</u> | <u>4.06</u>          | <u>1.45</u> | <u>219</u> | <u>0.01</u>                                          | <u>0.10</u>      | <u>0.06</u> | <u>684</u> | <u>0.95</u> |
| <u>gender alloc 13</u> | <u>3.59</u>                           | <u>1.20</u> | <u>466</u> | <u>3.51</u>          | <u>1.37</u> | <u>217</u> | <u>-0.08</u>                                         | <u>0.10</u>      | <u>0.76</u> | <u>681</u> | <u>0.45</u> |
| <u>gender alloc 14</u> | <u>2.44</u>                           | <u>2.00</u> | <u>458</u> | <u>2.68</u>          | <u>1.98</u> | <u>213</u> | <u>0.24</u>                                          | <u>0.17</u>      | <u>1.43</u> | <u>669</u> | <u>0.15</u> |
| <u>gender alloc 15</u> | <u>3.73</u>                           | <u>1.14</u> | <u>469</u> | <u>3.56</u>          | <u>1.39</u> | <u>214</u> | <u>-0.17</u>                                         | <u>0.10</u>      | <u>1.69</u> | <u>681</u> | <u>0.09</u> |
