# Supplementary material for: Men and women differ in their perception of gender bias in research institutions
Source: PubMed Central journal article supplement (PMC6894819; doi:10.1371/journal.pone.0225763), 2019-12-05
Supplement: pone.0225763.s012.pdf [file pone.0225763.s012.pdf]

**Table S5.** Cronbach alpha coefficients for each item and whole category.

| Variable                                                                                         | Adj. Total Mean | Adj. Total | Item-Adj. Total Corr | Squared Multiple | Cronbach's Alpha |
|--------------------------------------------------------------------------------------------------|-----------------|------------|----------------------|------------------|------------------|
| gender_eq_1                                                                                      | 22.805          | 7.035      | 0.5588               | 0.3967           | 0.7359           |
| gender_eq_2                                                                                      | 23.676          | 6.856      | 0.5707               | 0.3744           | 0.7304           |
| gender_eq_3                                                                                      | 24.106          | 6.878      | 0.4702               | 0.272            | 0.7579           |
| gender_eq_4                                                                                      | 23.629          | 6.817      | 0.5639               | 0.364            | 0.7318           |
| gender_eq_5                                                                                      | 23.194          | 7.166      | 0.3854               | 0.2567           | 0.7759           |
| gender_eq_6                                                                                      | 23.701          | 6.8        | 0.6052               | 0.4527           | 0.7216           |
| <i>Mean for category perceptions of gender equality in departments</i>                           |                 |            |                      |                  | 0.7761           |
| Variable                                                                                         | Adj. Total Mean | Adj. Total | Item-Adj. Total Corr | Squared Multiple | Cronbach's Alpha |
| gender_alloc_1                                                                                   | 54.13           | 11.38      | 0.6004               | 0.4264           | 0.8476           |
| gender_alloc_2                                                                                   | 54.45           | 11.52      | 0.5164               | 0.3555           | 0.8522           |
| gender_alloc_3                                                                                   | 54.16           | 11.31      | 0.6423               | 0.4878           | 0.8452           |
| gender_alloc_4                                                                                   | 53.79           | 11.27      | 0.591                | 0.423            | 0.8476           |
| gender_alloc_5                                                                                   | 54.34           | 11.23      | 0.6504               | 0.4536           | 0.8442           |
| gender_alloc_6                                                                                   | 53.97           | 11.37      | 0.6193               | 0.528            | 0.8467           |
| gender_alloc_7                                                                                   | 53.67           | 11.17      | 0.656                | 0.603            | 0.8436           |
| gender_alloc_8                                                                                   | 53.95           | 11.21      | 0.6799               | 0.5573           | 0.8426           |
| gender_alloc_9                                                                                   | 54.46           | 11.65      | 0.5235               | 0.2874           | 0.8527           |
| gender_alloc_10                                                                                  | 54.23           | 11.4       | 0.5561               | 0.392            | 0.8498           |
| gender_alloc_12                                                                                  | 54              | 11.37      | 0.6289               | 0.4851           | 0.8462           |
| gender_alloc_13                                                                                  | 55.19           | 11.92      | 0.2122               | 0.1525           | 0.8671           |
| gender_alloc_14                                                                                  | 56.23           | 11.74      | 0.1851               | 0.1226           | 0.8786           |
| gender_alloc_15                                                                                  | 54.86           | 11.86      | 0.2865               | 0.1609           | 0.8631           |
| <i>Mean for category perceptions of gender equality in the allocation of tasks and resources</i> |                 |            |                      |                  | 0.8614           |
