# Supplementary material for: Men and women differ in their perception of gender bias in research institutions
Source: PubMed Central journal article supplement (PMC6894819; doi:10.1371/journal.pone.0225763), 2019-12-05
Supplement: pone.0225763.s013.pdf [file pone.0225763.s013.pdf]

**Table S6.** Descriptive and t-tests results for *perceptions of gender equality in departments*.

“sd”=standard deviation. “N”=Sample size. “df”=degrees of freedom. “95CI”=95% Confidence intervals.

| Question                                                                               | Women       |             |            | Men         |             |            | Statistics  |             |                        |                 |             |
|----------------------------------------------------------------------------------------|-------------|-------------|------------|-------------|-------------|------------|-------------|-------------|------------------------|-----------------|-------------|
|                                                                                        | mean        | sd          | N          | mean        | sd          | N          | t-value     | df          | 95CI                   | P-Value         | Cohen's d   |
| In general, men and women are treated equally in my department                         | 5.06        | 1.79        | 825        | 6.05        | 1.41        | 468        | -11.05      | 1160        | 0.8205 - 1.1748        | 2.20E-16        | 0.61        |
| My department is committed to promoting gender equality                                | 4.31        | 1.93        | 826        | 4.97        | 1.92        | 467        | -5.95       | 973         | 0.444 - 0.881          | 3.72E-06        | 0.34        |
| If I had concerns about gender equality in my department. I would know who to approach | 3.9         | 2.15        | 823        | 4.52        | 2.17        | 468        | -4.98       | 962         | 0.378 - 0.869          | 6.86E-07        | 0.28        |
| My department is (or would be) responsive to concerns about gender equality            | 4.32        | 2.04        | 823        | 5.07        | 1.9         | 467        | -6.61       | 1027        | 0.526 - 0.970          | 1.33E-10        | 0.38        |
| Women are perceived as good leaders in research by other women                         | 5.01        | 1.8         | 823        | 5.05        | 2.26        | 465        | -0.28       | 799         | 0.205 - 0.274          | 7.79E-01        | 0.02        |
| Women are perceived as good leaders in research by men                                 | 4.03        | 1.88        | 821        | 5.4         | 1.76        | 466        | -13.11      | 1022        | 1.165 - 1.575          | 2.20E-16        | 0.75        |
| <b>ALL ITEMS</b>                                                                       | <b>4.44</b> | <b>1.93</b> | <b>812</b> | <b>5.18</b> | <b>1.90</b> | <b>461</b> | <b>7.42</b> | <b>2475</b> | <b>0.5204 – 0.9596</b> | <b>1.59E-13</b> | <b>0.39</b> |
