# Supplementary material for: Men and women differ in their perception of gender bias in research institutions
Source: PubMed Central journal article supplement (PMC6894819; doi:10.1371/journal.pone.0225763), 2019-12-05
Supplement: pone.0225763.s014.pdf [file pone.0225763.s014.pdf]

**Table S7.** Descriptive and t-tests results for *perceptions of gender equality in the allocation of tasks and resources*. “sd”=standard deviation. “N”=Sample size. “df”=degrees of freedom. “95CI”=95% Confidence intervals.

| Question                                                                 | Women       |             |            | Men         |             |            | Statistics  |             |                        |                 |             |
|--------------------------------------------------------------------------|-------------|-------------|------------|-------------|-------------|------------|-------------|-------------|------------------------|-----------------|-------------|
|                                                                          | mean        | sd          | N          | mean        | sd          | N          | t-value     | df          | 95CI                   | P-Value         | Cohen's d   |
| Allocation of desirable and demanded tasks/roles                         | 4.67        | 1.49        | 820        | 4.05        | 1.16        | 467        | 8.33        | 1167        | 0.4759 - 0.7689        | 1.40E-14        | 0.46        |
| Receipt of mentoring                                                     | 4.22        | 1.54        | 818        | 3.87        | 1.04        | 465        | 4.84        | 1244        | 0.2080 - 0.4914        | 1.38E-05        | 0.27        |
| Attention from senior management                                         | 4.67        | 1.53        | 814        | 3.87        | 1.17        | 462        | 10.37       | 1167        | 0.6427 - 0.9425        | 2.20E-16        | 0.58        |
| Access to informal circles of influence                                  | 5.16        | 1.51        | 820        | 4.13        | 1.51        | 464        | 11.75       | 959         | 0.859 - 1.2039         | 2.20E-16        | 0.68        |
| Receiving positive feedback from management                              | 4.52        | 1.57        | 820        | 3.79        | 1.29        | 463        | 8.95        | 1118        | 0.568 - 0.8871         | 2.20E-16        | 0.51        |
| Being recruited and selected for academic posts                          | 4.96        | 1.32        | 821        | 4.04        | 1.27        | 466        | 12.29       | 993         | 0.7721 - 1.0654        | 2.20E-16        | 0.71        |
| Promotion to senior posts                                                | 5.29        | 1.57        | 818        | 4.24        | 1.43        | 466        | 12.23       | 1045        | 0.8831 - 1.2205        | 2.20E-16        | 0.7         |
| Allocation of career development opportunities                           | 4.97        | 1.47        | 821        | 4.06        | 1.33        | 464        | 11.25       | 1040        | 0.7468 - 1.0624        | 2.20E-16        | 0.65        |
| Distribution of office/laboratory space or equipment                     | 4.27        | 1.17        | 819        | 3.81        | 1.02        | 466        | 7.32        | 1078        | 0.3350 - 0.5805        | 3.01E-12        | 0.42        |
| <b>Average perception of gender equality in professional development</b> | <b>4.75</b> | <b>1.46</b> | <b>793</b> | <b>3.98</b> | <b>1.25</b> | <b>454</b> | <b>8.24</b> | <b>6240</b> | <b>0.6098 - 0.9302</b> | <b>2.12E-16</b> | <b>0.57</b> |
| Invitations to conferences                                               | 4.61        | 1.58        | 819        | 3.91        | 1.17        | 464        | 9.12        | 1191        | 0.5536 - 0.8571        | 2.20E-16        | 0.5         |
| Appointments to editorships                                              | 4.01        | 2.07        | 813        | 3.42        | 1.71        | 462        | 5.53        | 1109        | 0.3840 - 0.807         | 1.78E-07        | 0.31        |

|                                                                            |             |             |     |             |             |     |       |      |                  |          |      |
|----------------------------------------------------------------------------|-------------|-------------|-----|-------------|-------------|-----|-------|------|------------------|----------|------|
| Recognition of intellectual contributions                                  | 4.88        | 1.43        | 820 | 4.07        | 1.13        | 464 | 11.15 | 1148 | 0.6658 - 0.9500  | 2.20E-16 | 0.63 |
| Distribution of office/laboratory space or equipment                       | 4.27        | 1.17        | 819 | 3.81        | 1.02        | 466 | 7.32  | 1078 | 0.3350 - 0.5805  | 3.01E-12 | 0.42 |
| <b>Average perception of gender equality in markers of esteem</b>          | <b>4.44</b> | <b>1.69</b> | 811 | <b>3.80</b> | <b>1.34</b> | 460 | 6.90  | 6240 | 0.4599 - 0.8201  | 5.57E-12 | 0.42 |
| Allocation of administrative tasks                                         | 3.25        | 1.42        | 816 | 3.6         | 1.19        | 463 | -4.67 | 1102 | 0.1969 - 0.5031  | 9.36E-06 | 0.27 |
| Allocation of pastoral care roles                                          | 2.29        | 2.05        | 804 | 2.45        | 2           | 455 | -1.32 | 961  | 0.3890 - 0.077   | 1.91E-01 | 0.08 |
| Allocation of teaching                                                     | 3.71        | 1.31        | 820 | 3.73        | 1.15        | 466 | -0.21 | 1072 | -0.2745          | 8.36E-01 | 0.02 |
| <b>Average perception of gender equality in additional academic duties</b> | <b>3.09</b> | <b>1.59</b> | 798 | <b>3.26</b> | <b>1.45</b> | 455 | 1.82  | 6240 | -0.0076 - 0.3476 | 0.0684   | 0.11 |
| <b>ALL ITEMS</b>                                                           | <b>4.33</b> | <b>1.54</b> | 765 | <b>3.80</b> | <b>1.30</b> | 441 | 8.628 | 2475 | 0.3591 - 0.7009  | 1.10E-17 | 0.37 |
