# Supplementary material for: Men and women differ in their perception of gender bias in research institutions
Source: PubMed Central journal article supplement (PMC6894819; doi:10.1371/journal.pone.0225763), 2019-12-05
Supplement: pone.0225763.s015.pdf [file pone.0225763.s015.pdf]

**Table S8.** Research area variable names, sample size for each research area and gender distribution by research area.

| <b>Category Number</b> | <b>Total Sample size</b> | <b>Women/Men Sample size</b> | <b>Category name</b>      |
|------------------------|--------------------------|------------------------------|---------------------------|
| 1                      | 378                      | 252/126                      | Biological Sciences       |
| 2                      | 196                      | 137/59                       | Medical & Health Sciences |
| 3                      | 29                       | 18/11                        | Business & Finance        |
| 4                      | 83                       | 52/31                        | Chemical Sciences         |
| 5                      | 30                       | 16/14                        | Earth Sciences            |
| 6                      | 164                      | 83/81                        | Engineering & computing   |
| 7                      | 87                       | 61/26                        | Humanities & Arts         |
| 8                      | 28                       | 19/9                         | Law                       |
| 9                      | 155                      | 85/70                        | Maths & Physical Sciences |
| 10                     | 145                      | 103/42                       | Social Sciences           |
