# Supplementary material for: Men and women differ in their perception of gender bias in research institutions
Source: PubMed Central journal article supplement (PMC6894819; doi:10.1371/journal.pone.0225763), 2019-12-05
Supplement: pone.0225763.s016.pdf [file pone.0225763.s016.pdf]

**Table S9.** Interaction analysis of gender by research area in *perceptions of gender equality in departments*. “Df”=degrees of freedom. “Sum Sq”=Total sum of squares. “Mean Sq”=Mean Squares.

| Item        |                 | Df | Sum Sq | Mean Sq | F value  | P-value   |
|-------------|-----------------|----|--------|---------|----------|-----------|
| Gender eq 1 | gender          | 1  | 297,2  | 297,213 | 108,871  | < 2.2e-16 |
|             | res_area        | 9  | 71,6   | 7,959   | 2,9155   | 0.002009  |
|             | gender:res_area | 9  | 28,2   | 3,137   | 1,1492   | 0,324499  |
| Gender eq 2 | gender          | 1  | 130,8  | 130,835 | 35,4906  | 3.312e-09 |
|             | res_area        | 9  | 53,7   | 5,962   | 1,6173   | 0,1052    |
|             | gender:res_area | 9  | 44,8   | 4,974   | 1,3493   | 0,2067    |
| Gender eq 3 | gender          | 1  | 116    | 115,958 | 24,9824  | 6.594e-07 |
|             | res_area        | 9  | 85,9   | 9,549   | 2,0573   | 0.03047   |
|             | gender:res_area | 9  | 16,8   | 1,87    | 0,4028   | 0,93404   |
| Gender eq 4 | gender          | 1  | 166,6  | 166,584 | 41,8242  | 1.421e-10 |
|             | res_area        | 9  | 22,7   | 2,522   | 0,6331   | 0,7694    |
|             | gender:res_area | 9  | 34,1   | 3,785   | 0,9504   | 0,48      |
| Gender eq 5 | gender          | 1  | 0,3    | 0,348   | 0,0901   | 0,76415   |
|             | res_area        | 9  | 83,8   | 9,3162  | 2,4106   | 0.01034   |
|             | gender:res_area | 9  | 46,8   | 5,198   | 1,345    | 0,20878   |
| Gender eq 6 | gender          | 1  | 558,1  | 558,11  | 166,7301 | < 2e-16   |
|             | res_area        | 9  | 46,8   | 5,2     | 1,5541   | 0,12418   |
|             | gender:res_area | 9  | 51     | 5,67    | 1,6938   | 0.08571   |
