# Supplementary material for: Men and women differ in their perception of gender bias in research institutions
Source: PubMed Central journal article supplement (PMC6894819; doi:10.1371/journal.pone.0225763), 2019-12-05
Supplement: pone.0225763.s017.pdf [file pone.0225763.s017.pdf]

**Table S10.** Interaction analysis of gender by research area in the *perceptions of gender equality in the allocation of tasks and resources*. “Df”=degrees of freedom. “Sum Sq”=Total sum of squares. “Mean Sq”=Mean Squares.

| Item            |                 | Df | Sum Sq | Mean Sq | F value  | P-value   |
|-----------------|-----------------|----|--------|---------|----------|-----------|
| Gender alloc 1  | gender          | 1  | 115,26 | 115,264 | 60,846   | 1.282e-14 |
|                 | res_area        | 9  | 17,98  | 1,998   | 1,0546   | 0,394     |
|                 | gender:res_area | 9  | 24,26  | 2,696   | 1,423    | 0,1729    |
| Gender alloc 2  | gender          | 1  | 36,26  | 36,258  | 19,0526  | 1.375e-05 |
|                 | res_area        | 9  | 12,72  | 1,413   | 0,7427   | 0,6699    |
|                 | gender:res_area | 9  | 22,15  | 2,461   | 1,293    | 0,2358    |
| Gender alloc 3  | gender          | 1  | 185,16 | 185,158 | 93,2697  | <2e-16    |
|                 | res_area        | 9  | 18,74  | 2,083   | 1,0491   | 0,3983    |
|                 | gender:res_area | 9  | 23,35  | 2,595   | 1,307    | 0,2283    |
| Gender alloc 4  | gender          | 1  | 315,39 | 315,387 | 138,2071 | <2e-16    |
|                 | res_area        | 9  | 24,64  | 2,737   | 1,1995   | 0,2911    |
|                 | gender:res_area | 9  | 13,92  | 1,547   | 0,6778   | 0,7297    |
| Gender alloc 5  | gender          | 1  | 156,62 | 156,622 | 71,4476  | <2e-16    |
|                 | res_area        | 9  | 11,51  | 1,279   | 0,5836   | 0,8114    |
|                 | gender:res_area | 9  | 13,88  | 1,542   | 0,7033   | 0,7063    |
| Gender alloc 6  | gender          | 1  | 250,92 | 250,922 | 147,9367 | <2e-16    |
|                 | res_area        | 9  | 22,63  | 2,515   | 1,4827   | 0,149     |
|                 | gender:res_area | 9  | 3,17   | 0,352   | 0,2074   | 0,9934    |
| Gender alloc 7  | gender          | 1  | 328,45 | 328,45  | 142,3545 | < 2e-16   |
|                 | res_area        | 9  | 43,79  | 4,87    | 2,1087   | 0.02615   |
|                 | gender:res_area | 9  | 6,09   | 0,68    | 0,2933   | 0,97676   |
| Gender alloc 8  | gender          | 1  | 242,6  | 242,596 | 120,8565 | < 2.2e-16 |
|                 | res_area        | 9  | 50,31  | 5,59    | 2,7851   | 0.003097  |
|                 | gender:res_area | 9  | 5,74   | 0,638   | 0,3178   | 0,969425  |
| Gender alloc 9  | gender          | 1  | 62,24  | 62,235  | 50,0823  | 2.436e-12 |
|                 | res_area        | 9  | 32,16  | 3,573   | 2,8752   | 0.002298  |
|                 | gender:res_area | 9  | 4,46   | 0,495   | 0,3985   | 0,936174  |
| Gender alloc 10 | gender          | 1  | 147,35 | 147,353 | 71,0624  | < 2e-16   |
|                 | res_area        | 9  | 33,97  | 3,774   | 1,8201   | 0.06049   |
|                 | gender:res_area | 9  | 13,7   | 1,522   | 0,734    | 0,67792   |
| Gender alloc 11 | gender          | 1  | 104,6  | 104,567 | 27,8382  | 1.552e-07 |
|                 | res_area        | 9  | 78     | 8,662   | 2,3061   | 0.01434   |
|                 | gender:res_area | 9  | 37,2   | 4,13    | 1,0994   | 0,36003   |
| Gender alloc 12 | gender          | 1  | 193,39 | 193,394 | 109,6944 | <2e-16    |
|                 | res_area        | 9  | 25,64  | 2,848   | 1,6156   | 0,1057    |
|                 | gender:res_area | 9  | 10,25  | 1,139   | 0,6462   | 0,758     |
| Gender alloc 13 | gender          | 1  | 35,58  | 35,578  | 19,7692  | 9.508e-06 |
|                 | res_area        | 9  | 18     | 2       | 1,1113   | 0,3513    |

|                 |                 |   |       |         |        |          |
|-----------------|-----------------|---|-------|---------|--------|----------|
|                 | gender:res_area | 9 | 11,02 | 1,224   | 0,6804 | 0,7273   |
|                 | gender          | 1 | 7,1   | 7,1032  | 1,7341 | 0,188125 |
| Gender alloc 14 | res_area        | 9 | 110,4 | 12,2694 | 2,9954 | 0.001541 |
|                 | gender:res_area | 9 | 28,5  | 3,1619  | 0,7719 | 0,642585 |
|                 | gender          | 1 | 0,07  | 0,06667 | 0,0427 | 0,8363   |
| Gender alloc 15 | res_area        | 9 | 22,42 | 2,49122 | 1,5966 | 0,1111   |
|                 | gender:res_area | 9 | 7,3   | 0,81133 | 0,52   | 0,8609   |
