# Supplementary material for: Men and women differ in their perception of gender bias in research institutions
Source: PubMed Central journal article supplement (PMC6894819; doi:10.1371/journal.pone.0225763), 2019-12-05
Supplement: pone.0225763.s018.pdf [file pone.0225763.s018.pdf]

**Table S11.** Position variable names, sample size for each position and gender distribution by position.

| <b>Category Number</b> | <b>Total Sample size</b> | <b>Women/Men Sample size</b> | <b>Category name</b>           |
|------------------------|--------------------------|------------------------------|--------------------------------|
| 0                      | 51                       | 40/11                        | Other                          |
| 1                      | 560                      | 311/245                      | Research student               |
| 2                      | 214                      | 141/71                       | Early career researcher        |
| 3                      | 213                      | 153/59                       | Intermediate career researcher |
| 4                      | 268                      | 181/83                       | Senior researcher              |
