# Supplementary material for: Men and women differ in their perception of gender bias in research institutions
Source: PubMed Central journal article supplement (PMC6894819; doi:10.1371/journal.pone.0225763), 2019-12-05
Supplement: pone.0225763.s019.pdf [file pone.0225763.s019.pdf]

**Table S12.** Interaction analysis of gender by position in the *perceptions of gender equality in departments*. “Df”=degrees of freedom. “Sum Sq”=Total sum of squares. “Mean Sq”=Mean Squares.

| Item        |                 | Df | Sum Sq  | Mean Sq | F value | P-value |
|-------------|-----------------|----|---------|---------|---------|---------|
| Gender eq 1 | gender          | 1  | 211.865 | 211.856 | 77.07   | 0.000   |
|             | position        | 3  | 19.55   | 6.511   | 2.37    | 0.069   |
|             | age             | 1  | 1       | 1.200   | 0.43    | 0.5100  |
|             | gender:age      | 1  | 12      | 11.700  | 4.23    | 0.0399  |
|             | gender:position | 3  | 11.44   | 3.813   | 1.39    | 0.245   |
| Gender eq 2 | gender          | 1  | 64.71   | 64.712  | 17.53   | 0.000   |
|             | position        | 3  | 38.72   | 12.905  | 3.50    | 0.015   |
|             | age             | 1  | 12      | 12.310  | 3.33    | 0.0684  |
|             | gender:age      | 1  | 15      | 14.880  | 4.02    | 0.0452  |
|             | gender:position | 3  | 17.15   | 5.717   | 1.55    | 0.200   |
| Gender eq 3 | gender          | 1  | 90.01   | 90.014  | 19.64   | 0.000   |
|             | position        | 3  | 77.30   | 25.767  | 5.62    | 0.001   |
|             | age             | 1  | 94      | 94.280  | 20.53   | <0.0001 |
|             | gender:age      | 1  | 21      | 20.890  | 4.55    | 0.0331  |
|             | gender:position | 3  | 14.37   | 4.791   | 1.05    | 0.371   |
| Gender eq 4 | gender          | 1  | 112.11  | 112.111 | 28.36   | 0.000   |
|             | position        | 3  | 44.74   | 14.913  | 3.77    | 0.010   |
|             | age             | 1  | 35      | 35.330  | 8.92    | 0.0029  |
|             | gender:age      | 1  | 0       | 0.080   | 0.02    | 0.8856  |
|             | gender:position | 3  | 10.17   | 3.391   | 0.86    | 0.462   |
| Gender eq 5 | gender          | 1  | 0.49    | 0.4918  | 0.13    | 0.723   |
|             | position        | 3  | 12.61   | 4.2043  | 1.07    | 0.359   |
|             | age             | 1  | 4       | 4.245   | 1.09    | 0.2980  |
|             | gender:age      | 1  | 5       | 5.205   | 1.33    | 0.2490  |
|             | gender:position | 3  | 18.52   | 6.1735  | 1.58    | 0.193   |
| Gender eq 6 | gender          | 1  | 400.91  | 400.910 | 119.21  | 0.000   |
|             | position        | 3  | 28.88   | 9.626   | 2.86    | 0.036   |
|             | age             | 1  | 28      | 28.400  | 8.43    | 0.0038  |
|             | gender:age      | 1  | 7       | 6.900   | 2.06    | 0.5100  |
|             | gender:position | 3  | 15.28   | 5.092   | 1.51    | 0.209   |
