# Supplementary material for: Men and women differ in their perception of gender bias in research institutions
Source: PubMed Central journal article supplement (PMC6894819; doi:10.1371/journal.pone.0225763), 2019-12-05
Supplement: pone.0225763.s020.pdf [file pone.0225763.s020.pdf]

**Table S13.** Interaction of gender by position in the *perceptions of gender equality in allocation of tasks and resources*. “Df”=degrees of freedom. “Sum Sq”=Total sum of squares. “Mean Sq”=Mean Squares.

| Item           |                 | Df | Sum Sq | Mean Sq | F value | P-value |
|----------------|-----------------|----|--------|---------|---------|---------|
| Gender alloc 1 | gender          | 1  | 79.74  | 79.736  | 42.58   | 0.000   |
|                | position        | 3  | 22.99  | 7.663   | 4.09    | 0.007   |
|                | age             | 1  | 22.8   | 22.770  | 12.20   | 0.0005  |
|                | gender:age      | 1  | 10.9   | 10.890  | 5.84    | 0.0158  |
|                | gender:position | 3  | 10.59  | 3.532   | 1.89    | 0.130   |
| Gender alloc 2 | gender          | 1  | 21.72  | 21.717  | 11.47   | 0.001   |
|                | position        | 3  | 10.66  | 3.553   | 1.88    | 0.132   |
|                | age             | 1  | 12.6   | 12.560  | 6.67    | 0.0099  |
|                | gender:age      | 1  | 10.1   | 10.110  | 5.37    | 0.0207  |
|                | gender:position | 3  | 9.20   | 3.067   | 1.62    | 0.183   |
| Gender alloc 3 | gender          | 1  | 130.32 | 130.316 | 66.12   | 0.000   |
|                | position        | 3  | 13.50  | 4.500   | 2.28    | 0.077   |
|                | age             | 1  | 6.9    | 6.940   | 3.53    | 0.0604  |
|                | gender:age      | 1  | 15.6   | 15.580  | 7.92    | 0.0050  |
|                | gender:position | 3  | 11.21  | 3.736   | 1.90    | 0.128   |
| Gender alloc 4 | gender          | 1  | 235.50 | 235.499 | 104.72  | 0.000   |
|                | position        | 3  | 29.83  | 9.943   | 4.42    | 0.004   |
|                | age             | 1  | 21.6   | 21.600  | 9.70    | 0.0019  |
|                | gender:age      | 1  | 20.8   | 20.800  | 9.35    | 0.0023  |
|                | gender:position | 3  | 15.15  | 5.051   | 2.25    | 0.081   |
| Gender alloc 5 | gender          | 1  | 100.30 | 100.303 | 46.53   | 0.000   |
|                | position        | 3  | 6.48   | 2.160   | 1.00    | 0.391   |
|                | age             | 1  | 6.5    | 6.550   | 3.05    | 0.0810  |
|                | gender:age      | 1  | 30.8   | 30.830  | 14.36   | 0.0002  |
|                | gender:position | 3  | 22.06  | 7.352   | 3.41    | 0.017   |
| Gender alloc 6 | gender          | 1  | 216.83 | 216.833 | 127.91  | 0.000   |
|                | position        | 3  | 1.64   | 0.546   | 0.32    | 0.809   |
|                | age             | 1  | 1.8    | 1.760   | 1.05    | 0.3070  |
|                | gender:age      | 1  | 1.4    | 1.390   | 0.83    | 0.3640  |
|                | gender:position | 3  | 6.32   | 2.108   | 1.24    | 0.293   |
| Gender alloc 7 | gender          | 1  | 274.21 | 274.206 | 118.03  | 0.000   |
|                | position        | 3  | 3.62   | 1.206   | 0.52    | 0.669   |
|                | age             | 1  | 0.8    | 0.800   | 0.36    | 0.5500  |
|                | gender:age      | 1  | 3.1    | 3.100   | 1.34    | 0.2480  |
|                | gender:position | 3  | 2.64   | 0.878   | 0.38    | 0.769   |
| Gender alloc 8 | gender          | 1  | 189.22 | 189.215 | 93.24   | 0.000   |

|                 |                 |   |        |         |       |         |
|-----------------|-----------------|---|--------|---------|-------|---------|
|                 | position        | 3 | 9.73   | 3.243   | 1.60  | 0.188   |
|                 | age             | 1 | 3.5    | 3.530   | 1.75  | 0.1860  |
|                 | gender:age      | 1 | 2.4    | 2.360   | 1.17  | 0.2790  |
|                 | gender:position | 3 | 1.72   | 0.573   | 0.28  | 0.838   |
|                 | gender          | 1 | 44.51  | 44.506  | 35.85 | 0.000   |
| Gender alloc 9  | position        | 3 | 17.01  | 5.670   | 4.57  | 0.003   |
|                 | age             | 1 | 13.8   | 13.800  | 11.21 | 0.0008  |
|                 | gender:age      | 1 | 8.7    | 8.710   | 7.07  | 0.0079  |
|                 | gender:position | 3 | 3.93   | 1.311   | 1.06  | 0.367   |
|                 | gender          | 1 | 114.40 | 114.401 | 55.69 | 0.000   |
| Gender alloc 10 | position        | 3 | 23.63  | 7.877   | 3.83  | 0.009   |
|                 | age             | 1 | 25.3   | 25.290  | 12.40 | 0.0004  |
|                 | gender:age      | 1 | 12.8   | 12.800  | 6.27  | 0.0124  |
|                 | gender:position | 3 | 15.10  | 5.035   | 2.45  | 0.062   |
|                 | gender          | 1 | 99.26  | 99.2601 | 27.30 | 0.000   |
| Gender alloc 11 | position        | 3 | 195.96 | 65.3186 | 17.97 | 0.000   |
|                 | age             | 1 | 132    | 132.100 | 36.05 | <0.0001 |
|                 | gender:age      | 1 | 6      | 5.640   | 1.54  | 0.2150  |
|                 | gender:position | 3 | 1.77   | 0.5915  | 0.16  | 0.921   |
|                 | gender          | 1 | 158.83 | 158.835 | 91.20 | 0.000   |
| Gender alloc 12 | position        | 3 | 14.90  | 4.967   | 2.85  | 0.036   |
|                 | age             | 1 | 7.9    | 7.930   | 4.55  | 0.0332  |
|                 | gender:age      | 1 | 9.6    | 9.630   | 5.52  | 0.0189  |
|                 | gender:position | 3 | 6.41   | 2.136   | 1.23  | 0.299   |
|                 | gender          | 1 | 21.37  | 21.3735 | 12.04 | 0.001   |
|                 | position        | 3 | 33.66  | 11.2185 | 6.32  | 0.000   |
| Gender alloc 13 | age             | 1 | 36.3   | 36.260  | 20.42 | <0.0001 |
|                 | gender:age      | 1 | 1.8    | 1.780   | 1.00  | 0.3170  |
|                 | gender:position | 3 | 0.97   | 0.3224  | 0.18  | 0.909   |
|                 | gender          | 1 | 1.67   | 1.672   | 0.40  | 0.525   |
|                 | position        | 3 | 38.55  | 12.848  | 3.11  | 0.026   |
| Gender alloc 14 | age             | 1 | 23     | 23.151  | 5.60  | 0.0181  |
|                 | gender:age      | 1 | 3      | 3.097   | 0.75  | 0.3870  |
|                 | gender:position | 3 | 10.84  | 3.612   | 0.87  | 0.454   |
|                 | gender          | 1 | 0.01   | 0.1217  | 0.01  | 0.929   |
|                 | position        | 3 | 10.92  | 3.64107 | 2.35  | 0.071   |
| Gender alloc 15 | age             | 1 | 5      | 4.990   | 3.20  | 0.0739  |
|                 | gender:age      | 1 | 1.1    | 1.126   | 0.72  | 0.3957  |
|                 | gender:position | 3 | 2.32   | 0.77397 | 0.50  | 0.683   |
