# Supplementary material for: Men and women differ in their perception of gender bias in research institutions
Source: PubMed Central journal article supplement (PMC6894819; doi:10.1371/journal.pone.0225763), 2019-12-05
Supplement: pone.0225763.s021.pdf [file pone.0225763.s021.pdf]

**Table S14.** Type of institution variable names, sample size for each type of institution and gender distribution.

| <b>Category Number</b> | <b>Total Sample size</b> | <b>Women/Men Sample size</b> | <b>Category name</b> |
|------------------------|--------------------------|------------------------------|----------------------|
| 1                      | 691                      | 432/259                      | Public university    |
| 2                      | 136                      | 89/47                        | Private university   |
| 3                      | 342                      | 219/123                      | Research centre      |
