# Supplementary material for: Men and women differ in their perception of gender bias in research institutions
Source: PLoS One. 2019 Dec 5;14(12):e0225763. doi: 10.1371/journal.pone.0225763 (PMC6894819; doi:10.1371/journal.pone.0225763)
Supplement: S4 Table — (PDF) [file pone.0225763.s011.pdf]

**Table S4.** List of the institutions represented in the sample analysed.

| University/Centre name                                                                         | Number of respondents |
|------------------------------------------------------------------------------------------------|-----------------------|
| ABB                                                                                            | 1                     |
| Agencia Aragonesa para la Investigación y el Desarrollo                                        | 1                     |
| AZTI                                                                                           | 1                     |
| Basque Centre for Climate Change                                                               | 3                     |
| Biodonostia Health Research Institute                                                          | 1                     |
| Barcelona Supercomputer Center                                                                 | 1                     |
| Observatorio astronomico de Calar Alto                                                         | 1                     |
| CCE                                                                                            | 1                     |
| Centre de Recerca en Agrigenòmica                                                              | 1                     |
| Centro Andaluz de Biología del Desarrollo                                                      | 1                     |
| Centro Biología Molecular Severo Ochoa                                                         | 1                     |
| Centro de Biología Molecular Severo Ochoa                                                      | 6                     |
| Centro de Biología Molecular Severo Ochoa                                                      | 5                     |
| Centro de Estudios de Física del Cosmos de Aragon                                              | 1                     |
| Centro de Investigación Príncipe Felipe                                                        | 6                     |
| Centro de Investigación y Tecnología Agroalimentaria                                           | 1                     |
| Centro de Investigaciones Energéticas, Medioambientales y Tecnológicas                         | 1                     |
| Centro de Regulación Genómica                                                                  | 1                     |
| Centro Nacional de Biotecnología                                                               | 13                    |
| Centro Nacional de Métodos Numéricos en Ingeniería                                             | 1                     |
| Centro Universitario de la Defensa                                                             | 1                     |
| Centro de Investigación Biomédica en Red                                                       | 1                     |
| CIC bioGUNE                                                                                    | 16                    |
| CIC BiomaGUNE                                                                                  | 1                     |
| CIC nanoGUNE                                                                                   | 2                     |
| Centro de Investigaciones Energéticas, Medioambientales y Tecnológicas                         | 6                     |
| Clínica Universidad de Navarra                                                                 | 1                     |
| Centro Nacional de Investigaciones Cardiovasculares                                            | 7                     |
| Centro Nacional de Investigaciones Oncológicas                                                 | 2                     |
| Colegio Agora                                                                                  | 1                     |
| Centro de Investigación Agrigenómica UAB                                                       | 3                     |
| Centro de Investigación Ecológica y Aplicaciones Forestales                                    | 1                     |
| Consejo Superior de Investigaciones Científicas                                                | 129                   |
| Centro Tecnológico de Telecomunicacions de Catalunya                                           | 2                     |
| Deusto                                                                                         | 1                     |
| ESA                                                                                            | 2                     |
| Estación Experimental del Zaidín                                                               | 2                     |
| Fundación para la Investigación Médica Aplicada                                                | 1                     |
| Fundacio Scito                                                                                 | 1                     |
| Fundación CTIC                                                                                 | 1                     |
| Fundación Deusto                                                                               | 1                     |
| Fundacion para el Fomento de la Investigacion Sanitaria y Biomedica de la Comunidad Valenciana | 1                     |
| Centro Pfizer-Universidad de Granada-Junta de Andalucía de Genómica e Investigación Oncológica | 1                     |
| Henkel                                                                                         | 1                     |
| Hospital                                                                                       | 2                     |
| Hospital 12 de Octubre                                                                         | 3                     |
| Hospital Clinic de Barcelona                                                                   | 1                     |
| Hospital General Universitario Gregorio Marañón                                                | 1                     |
| Hospital Parc Taulí                                                                            | 2                     |

|                                                                                |    |
|--------------------------------------------------------------------------------|----|
| Hospital Sant Joan de Déu                                                      | 1  |
| Hospital Universitario Central de Asturias                                     | 1  |
| Hospital Universitario de La Princesa                                          | 1  |
| Hospital Universitario de Las Palmas de Gran Canaria "Doctor Negrín"           | 1  |
| Hospital Universitario Germans Trias i Pujol                                   | 1  |
| Hospital Universitario Gregorio Marañón                                        | 1  |
| Hospital Universitario Puerta de Hierro                                        | 1  |
| Hospital Universitario Ramón y Cajal de Madrid                                 | 1  |
| Hospital Virgen del Rocio                                                      | 1  |
| Institute of Biomedicine and Biotechnology of Cantabria                        | 1  |
| Institute for Bioengineering of Catalonia                                      | 1  |
| Institute of Molecular Biology and Genetics IBGM                               | 2  |
| Instituto de Ciencias Matemáticas                                              | 1  |
| Institut d'Investigació Biomèdica de Bellvitge                                 | 2  |
| Investigation en la Gestión de Organizaciones e Instalaciones Deportivas       | 1  |
| Institute for Health Science Research Germans Trias i Pujol                    | 1  |
| Institutos Madrileños de Estudios Avanzados                                    | 1  |
| Institutos Madrileños de Estudios Avanzados - Food                             | 1  |
| Institutos Madrileños de Estudios Avanzados - Nanociencia                      | 1  |
| Institutos Madrileños de Estudios Avanzados - Water                            | 1  |
| Instituto Madrileño de Investigación y Desarrollo Rural, Agrario y Alimentario | 2  |
| Instituto de Biotecnología de Leon                                             | 1  |
| Incliva                                                                        | 1  |
| Instituto Nacional de Investigación y Tecnología Agraria y Alimentaria         | 5  |
| Instituto de Investigación Vall d'Hebron                                       | 3  |
| Instituto de Investigaciones Biomédicas de Málaga                              | 1  |
| Institut Català de la Salut                                                    | 1  |
| Institut Català de Paleontologia Miquel Crusafont                              | 1  |
| Institut d'Estudis Espacials de Catalunya                                      | 1  |
| Institut d'Investigació Germans Trias i Pujol                                  | 1  |
| Institut de Recerca Biomèdica de Lleida                                        | 1  |
| Institut de Recerca Sant Joan de Déu                                           | 1  |
| Institute of Biomedical Research of Salamanca                                  | 1  |
| Instituto Catalán de Arqueología Clásica                                       | 1  |
| Instituto Catalán de investigación Química                                     | 1  |
| Instituto Catalán de Investigación Química                                     | 16 |
| Instituto Catalán de Neurociencia y Nanotechnology                             | 14 |
| Instituto de Astrofísica de Canarias                                           | 6  |
| Instituto de Astrofísica de Canarias                                           | 2  |
| Instituto de Biomedicina de Sevilla                                            | 3  |
| Instituto de Ciencias Fotónicas                                                | 1  |
| Instituto de Educación Física de Cataluña                                      | 1  |
| Instituto de Educación Secundaria                                              | 1  |
| Instituto de Física de Cantabria                                               | 1  |
| Instituto de Física de Cantabria                                               | 1  |
| Instituto de Investigación Biosanitaria de Granada                             | 1  |
| Instituto de Investigación contra la Leucemia Josep Carreras                   | 12 |
| Instituto de Investigación Sanitaria Galicia Sur                               | 1  |
| Instituto de Investigación Sanitaria Hospital 12 de Octubre                    | 1  |
| Instituto de Investigación Sanitaria La Fe                                     | 1  |
| Instituto de Investigación Sanitaria Pere Virgili                              | 1  |
| Instituto de Investigación y Formación Agraria y Pesquera de Andalucía         | 1  |
| Instituto de Investigaciones Biomédicas "Alberto Sols"                         | 6  |
| Instituto de Neurociencias de Alicante                                         | 1  |
| Instituto de Neurociencias de Castilla y León                                  | 1  |

|                                                                 |     |
|-----------------------------------------------------------------|-----|
| Instituto de Oncología de Asturias                              | 1   |
| Instituto de Salud Carlos III                                   | 5   |
| Instituto Investigación Sanitaria Princesa                      | 1   |
| Instituto Maimónides de Investigación Biomédica de Córdoba      | 1   |
| instituto Tecnológico Agrario de Castilla y León                | 1   |
| Instituto Nacional de Técnica Aeroespacial                      | 2   |
| Intituto de investigaciones biomedicas de Barcelona (IIBB-CSIC) | 1   |
| Barcelona - Institute for Research in Biomedicine               | 6   |
| Instituto Ramón y Cajal de Investigación Sanitaria (IRYCIS)     | 1   |
| IsGlobal                                                        | 1   |
| Instituto de Investigación Sanitaria del Principado de Asturias | 1   |
| Laboratorios Syva                                               | 1   |
| Leartiker S. Coop.                                              | 1   |
| n-life Therapeutics                                             | 1   |
| Neiker                                                          | 1   |
| Observatorio del Ebro                                           | 1   |
| Polymat                                                         | 1   |
| Rey Juan Carlos University                                      | 1   |
| SERGAS                                                          | 2   |
| Servicio Andaluz de Salud                                       | 1   |
| SNiBA                                                           | 1   |
| Tecnia                                                          | 1   |
| Universida de Vigo                                              | 1   |
| Universidad Abierta de Cataluña                                 | 2   |
| Universidad Antonio de Nebrija                                  | 11  |
| Universidad Autónoma de Madrid                                  | 1   |
| Universidad Autónoma de Barcelona                               | 133 |
| Universidad Autonoma de Madrid                                  | 5   |
| Universidad Autónoma de Madrid                                  | 10  |
| Universidad Calos III                                           | 1   |
| Universidad Carlos III de Madrid                                | 52  |
| Universidad Católica de Murcia                                  | 1   |
| Universidad Complutende de Madrid                               | 3   |
| Universidad complutense de madrid                               | 1   |
| Universidad Complutense de madrid                               | 1   |
| Universidad Complutense de Madrid                               | 29  |
| Universidad Complutense Madrid                                  | 1   |
| Universidad de A Coruña                                         | 4   |
| Universidad de Alcala                                           | 1   |
| Universidad de Alcalá                                           | 1   |
| Universidad de Alicante                                         | 5   |
| Universidad de Almeria                                          | 1   |
| Universidad de Almería                                          | 1   |
| Universidad de Barcelona                                        | 14  |
| Universidad de BARCELONA                                        | 1   |
| Universidad de Cádiz                                            | 1   |
| Universidad de Cantabria                                        | 3   |
| Universidad de Casilla - La Mancha                              | 3   |
| Universidad de Castilla la Mancha                               | 1   |
| Universidad de Castilla-La Mancha                               | 43  |
| Universidad de Córdoba                                          | 4   |
| Universidad de Coruña                                           | 1   |
| Universidad de Deusto                                           | 45  |
| Universidad de Extremadura                                      | 4   |
| Universidad de Girona                                           | 1   |

|                                               |             |
|-----------------------------------------------|-------------|
| Universidad de Granada                        | 9           |
| Universidad de Jaén                           | 1           |
| Universidad de la Laguna                      | 4           |
| Universidad de La Rioja                       | 5           |
| Universidad de las Islas Baleares             | 5           |
| Universidad de Las Palmas de Gran Canaria     | 3           |
| Universidad de Leon                           | 7           |
| Universidad de León                           | 31          |
| Universidad de Lleida                         | 14          |
| Universidad de Malaga                         | 2           |
| Universidad de Málaga                         | 1           |
| Universidad de Mondragón                      | 2           |
| Universidad de Murcia                         | 3           |
| Universidad de Navarra                        | 32          |
| Universidad de Oviedo                         | 2           |
| Universidad de Rioja                          | 1           |
| Universidad de Salamanca                      | 14          |
| Universidad de Santiago de Compostela         | 9           |
| Universidad de Sevilla                        | 8           |
| Universidad de Valencia                       | 17          |
| Universidad de Valladolid                     | 62          |
| Universidad de Vigo                           | 45          |
| Universidad de Zaragoza                       | 25          |
| Universidad del País Vasco                    | 22          |
| Universidad Europea                           | 1           |
| Universidad Internacional de Cataluña         | 1           |
| Universidad Internacional de la Rioja         | 4           |
| Universidad Miguel Hernandez                  | 1           |
| Universidad Nacional de Educación a Distancia | 3           |
| Universidad Pablo de Olavide                  | 2           |
| Universidad Politécnica de Cartagena          | 2           |
| Universidad Politécnica de Cataluña           | 5           |
| Universidad Politecnica de Madrid             | 3           |
| Universidad Politécnica de Madrid             | 3           |
| Universidad Politecnica de Valencia           | 2           |
| Universidad Politécnica de Valencia           | 3           |
| Universidad Pompeu Fabra                      | 1           |
| Universidad Publica de Navarra                | 1           |
| Universidad Pública de Navarra                | 1           |
| Universidad Ramón Llull                       | 36          |
| Universidad Rey Juan Carlos                   | 39          |
| Universidad Rovira i Virgili                  | 2           |
| Universidad Valladolid                        | 1           |
| Universidad Zaragoza                          | 1           |
| Universitat Autònoma Barcelona                | 2           |
| Universitat Jaume I                           | 1           |
| Universitat Politecnica de Valencia           | 1           |
| Universitat Pompeu Fabra                      | 3           |
| Vicomtech                                     | 1           |
| <b>TOTAL</b>                                  | <b>1221</b> |
